# Supplementary material
Source: ML conference proceedings conference paper supplement (https://openaccess.thecvf.com/content/CVPR2021/html/Liu_RankDetNet_Delving_Into_CVPR_2021_paper.html)
Supplement: Supplementary file 1 [file Liu_RankDetNet_Delving_Into_CVPR_2021_supplemental.pdf]

# RankDetNet: Delving into Ranking Constraints for Object Detection

## Supplementary Material

Ji Liu, Dong Li, Rongzhang Zheng, Lu Tian, Yi Shan  
Xilinx Inc., Beijing, China

{jiliul, dongl, treemann, lutian, yishan}@xilinx.com

### 1. Overview

In this supplementary material, we present additional experimental results and analysis.

- We present more results of reverse pairs compared between different detection baselines and our method.
- We show additional sample distribution for the FCOS-ATSS baseline and our method.
- We present ablation studies on the bin size in our grouping strategy of global and class-specific ranking losses.
- We present the per-class AP for the 10 classes with the most and fewest GT boxes on COCO, respectively.
- We provide more qualitative results of our method for 2D and 3D object detection.

### 2. More Analysis of Reserve Pairs

We define three types of reverse pairs for better understanding the effect of our ranking constraints. Table 4 presents the ratios of reverse pairs to all pairs after training compared with different detection baselines and our method. The results show that our RankDetNet can largely reduce the amount of reverse pairs for both anchor-based and anchor-free detectors, e.g., reducing 7% and 6% ratios of F-B and P-N reverse pairs compared with RetinaNet (ResNet-50), respectively. These results demonstrate the effectiveness of our ranking constraints for better optimization.

### 3. More Analysis of Sample Distribution

Figure 1 shows sample distributions for the FCOS-ATSS baseline and our method. For the foreground or positive samples, our method can generate higher object confidence scores. Compared with the foreground and background distributions, the results show that our method can reduce their

overlap. Similarly, the reduced overlap can be observed between the positive and negative sample distributions for a specific class (person). Compared with IoU overlap and object confidence scores for positive samples, the results show that our method obtains more consistent distributions and stronger correlation. These results further validate that our method can help improve optimization for detection from the perspective of sample distribution.

### 4. Ablation Study on Bin Size

We test different numbers of bins for the global and class-specific losses. Table 1 presents the detailed results. The extreme case of #bin=1 does not work well, and too many bins may cost longer training time and more memory usage. In general, the hyper-parameter of bin size is not sensitive in a wide value range based on our experiments. We set the bin size as 15 in the global ranking loss and 3 for each class in the class-specific ranking loss.

### 5. Per-class AP on COCO

COCO is a highly imbalanced dataset. The amount of ground-truth bounding boxes for each class varies a lot. Table 2 and Table 3 present the per-class AP for the 10 classes with the most and fewest GT boxes on COCO, respectively. The results show that our method performs better than the RetinaNet baseline on most of imbalanced classes, e.g., +3.5% AP on the person class with 262465 GT boxes and +6.1% on the toaster class with 225 GT boxes.

### 6. More Qualitative Results

Figure 2 presents more qualitative results of our method for 2D and 3D object detection. Our RankDetNet can generate accurate 2D and 3D bounding boxes for RGB and Bird-Eye-View (BEV) images.

| Methods        | #Bin for global | #Bin for class-specific | AP   |
|----------------|-----------------|-------------------------|------|
| RankDetNet-R50 | 15              | 1                       | 37.0 |
| RankDetNet-R50 | 15              | 3                       | 37.8 |
| RankDetNet-R50 | 15              | 5                       | 37.8 |
| RankDetNet-R50 | 15              | 8                       | 37.7 |
| RankDetNet-R50 | 15              | 12                      | 37.7 |
| RankDetNet-R50 | 1               | 3                       | 33.5 |
| RankDetNet-R50 | 6               | 3                       | 37.6 |
| RankDetNet-R50 | 10              | 3                       | 37.7 |
| RankDetNet-R50 | 15              | 3                       | 37.8 |
| RankDetNet-R50 | 25              | 3                       | 37.7 |

Table 1. Detection performance comparisons (%) on the COCO 2017 validation set with different numbers of bins.

| Methods    | person | carrot | car   | chair | book  |
|------------|--------|--------|-------|-------|-------|
| #GT boxes  | 262465 | 51719  | 43867 | 38491 | 24715 |
| RetinaNet  | 49.3   | 19.9   | 38.9  | 23.2  | 11.5  |
| RankDetNet | 52.8   | 19.9   | 41.6  | 24.1  | 13.1  |
| AP gain    | 3.5    | 0.0    | 2.7   | 0.9   | 1.6   |

  

| Methods    | bottle | cup   | dining table | bowl  | traffic light |
|------------|--------|-------|--------------|-------|---------------|
| #GT boxes  | 24342  | 20650 | 15714        | 14358 | 12884         |
| RetinaNet  | 33.8   | 38.7  | 24.1         | 37.3  | 22.8          |
| RankDetNet | 35.1   | 41.2  | 26.2         | 39.5  | 23.8          |
| AP gain    | 1.3    | 2.5   | 2.1          | 2.2   | 1.0           |

Table 2. Comparisons between our method and RetinaNet on the top 10 classes with the most GT boxes of COCO.

| Methods    | mouse | stop sign | tooth brush | fire hydrant | microwave |
|------------|-------|-----------|-------------|--------------|-----------|
| #GT boxes  | 2262  | 1983      | 1954        | 1865         | 1673      |
| RetinaNet  | 56.5  | 59.6      | 13.4        | 61.3         | 48.3      |
| RankDetNet | 56.7  | 63.5      | 15.4        | 62.7         | 55.0      |
| AP gain    | 0.2   | 3.9       | 2.0         | 1.4          | 6.7       |

  

| Methods    | scissors | bear | parking meter | toaster | hair drier |
|------------|----------|------|---------------|---------|------------|
| #GT boxes  | 1481     | 1294 | 1285          | 225     | 198        |
| RetinaNet  | 19.0     | 64.5 | 46.0          | 11.5    | 0.8        |
| RankDetNet | 24.3     | 67.5 | 45.6          | 17.6    | 1.5        |
| AP gain    | 5.3      | 3.0  | -0.4          | 6.1     | 0.7        |

Table 3. Comparisons between our method and RetinaNet on the last 10 classes with the fewest GT boxes of COCO.

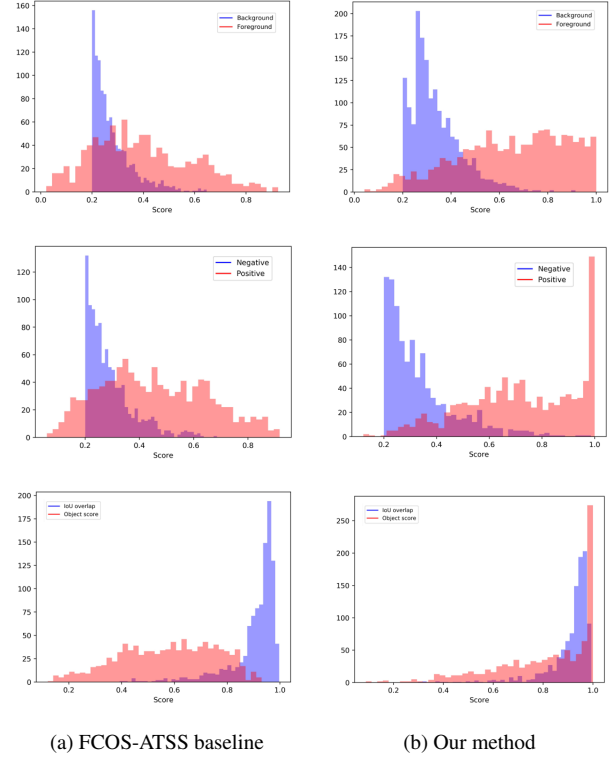

Figure 1. Comparisons of sample distribution between the FCOS-ATSS baseline and our method. We plot foreground and background distribution (first row), positive and negative distribution for the person class (second row) and distribution of IoU overlap and object confidence score for the person class (third row). We select background / negative samples with score  $> 0.2$  for better visualization.

| Methods                | Backbone              | F-B  | P-N  | P-P  |
|------------------------|-----------------------|------|------|------|
| RetinaNet              | ResNet-50             | 0.33 | 0.28 | 0.44 |
| RetinaNet + RankDetNet | ResNet-50             | 0.26 | 0.22 | 0.41 |
| RetinaNet              | ResNet-101            | 0.30 | 0.26 | 0.44 |
| RetinaNet + RankDetNet | ResNet-101            | 0.24 | 0.21 | 0.41 |
| RetinaNet              | ResNeXt-64×4d-101     | 0.27 | 0.23 | 0.44 |
| RetinaNet + RankDetNet | ResNeXt-64×4d-101     | 0.20 | 0.18 | 0.41 |
| FCOS-ATSS              | ResNet-50             | 0.24 | 0.18 | 0.42 |
| FCOS-ATSS + RankDetNet | ResNet-50             | 0.17 | 0.13 | 0.41 |
| FCOS-ATSS              | ResNet-50-DCN         | 0.21 | 0.16 | 0.42 |
| FCOS-ATSS + RankDetNet | ResNet-50-DCN         | 0.13 | 0.11 | 0.41 |
| FCOS-ATSS              | ResNeXt-64×4d-101-DCN | 0.11 | 0.12 | 0.43 |
| FCOS-ATSS + RankDetNet | ResNeXt-64×4d-101-DCN | 0.09 | 0.10 | 0.42 |

Table 4. Ratios of reverse pairs compared with different detection baselines and our method. F-B: foreground-background reverse pair where foreground has lower score. P-N: positive-negative reverse pair where the positive sample of a specific class has lower score. P-P: positive-positive reverse pair where the one positive sample with larger IoU overlap with GT has lower object confidence than the other.

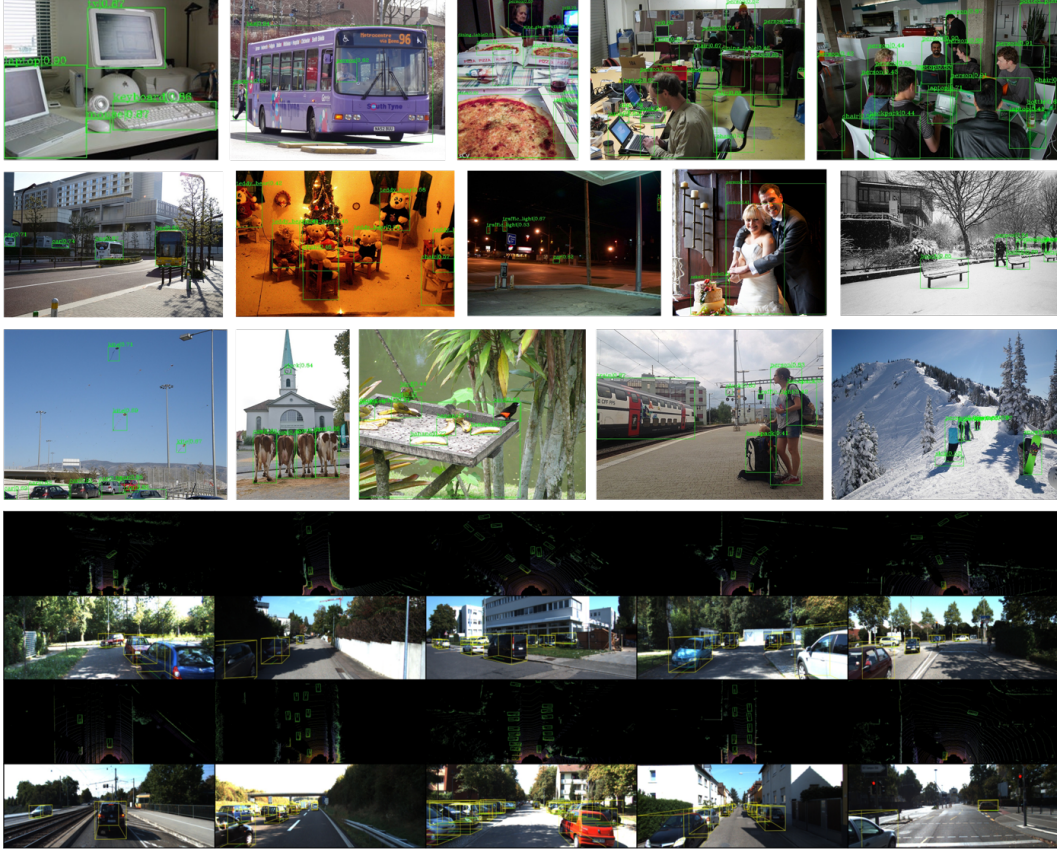

Figure 2. Examples of qualitative results by our RankDetNet for 2D and 3D object detection.
